# Supplementary material for: Early Changes in Crayfish Hemocyte Proteins after Injection with a β-1,3-glucan, Compared to Saline Injected and Naive Animals
Source: MDPI journal article supplement (doi:10.3390/ijms22126464), 2021-06-16
Supplement: s1 [file s1]

**Table S4:** Primer sequences used for RT-PCR analysis (F=forward, R=reverse).

| Gene                                       | Sequence 5'-3'                  |
|--------------------------------------------|---------------------------------|
| Kazal-type proteinase inhibitor F          | GGTGAACCTCACAGGTGTTGT           |
| Kazal-type proteinase inhibitor R          | ACTGTTCTCTGCTCCTCTGT            |
| i-type lysozyme F                          | AGTGCCTGTTCAAGTCAGCTC           |
| i-type lysozyme R                          | GGAACCAG CCACAGTCTACC           |
| i-type lysozyme F, qRT-PCR                 | CAGGAATATGCCCCTGTGGATGA         |
| i-type lysozyme R, qRT-PCR                 | TTAGTGGATGCCAAGTTTAGCGC         |
| Masquerade F                               | TAAACACAAGCGGAGTAGGC            |
| Masquerade R                               | TAGCCACTACCACCTGTTCC            |
| GBYW01037126.1 (putative chitin-binding) F | GAGTCACGGAGGATCGATTG            |
| GBYW01037126.1 (putative chitin-binding) R | GAAGCCTGTTTCAGAGGTCC            |
| 18S ribosomal protein F                    | AGTTTCAGCACATCCTGCGT            |
| 18S ribosomal protein R                    | TCAGTCATCTCTCCAGCACG            |
| 18S ribosomal protein F, qRT-PCR           | AGTTTCAGCACATCCTGCCTTCCCTTCAGA  |
| 18S ribosomal protein R, qRT-PCR           | ATCTTCTCAACCTCTTCCTCAGTCATCTCTC |
